# Supplementary material
Source: PubMed Central journal article supplement (PMC2901431)
Supplement: 1000643107_pnas.201000643SI.pdf [file 1000643107_pnas.201000643SI.pdf]

# Supporting Information

Kong et al. 10.1073/pnas.1000643107

## SI Materials and Methods

**Strains and Growth Conditions.** *Mycobacterium tuberculosis* (Mtb) strain Erdman (ATCC35801), H37Rv (ATCC25618), CDC1551 (CSU TVTRM Contract), bacillus Calmette-Guérin (Pasteur), and derivatives were grown in Middlebrook (M) 7H9 broth (Difco) supplemented with 0.5% glycerol, 10% oleic acid albumin dextrose complex (OADC), and 0.05% Tween 80 (M-OADC-TW broth). The H37Rv *blaC* mutant was kindly provided by Martin S. Pavelka (University of Rochester). Viable counts were determined for all bacterial cultures and all experimental conditions using Middlebrook 7H9 supplemented with 10% OADC and 15 g/L Bacto agar (M-OADC agar) or on 7H11 agar. Both *Staphylococcus aureus* (MRSA, kindly provided by Greg A. Somerville, University of Nebraska, Lincoln) and *Pseudomonas aeruginosa* strain PA01 (kindly provided by Thomas K. Wood, Texas A&M University) were grown until an OD<sub>600</sub> of 0.5 in Luria Broth (LB) and CFU were determined by plating dilutions on LB agar. When necessary, media were supplemented with 50 µg/mL hygromycin and 25 µg/mL kanamycin. Stocks were prepared by growth standing at 37 °C until an OD<sub>600</sub> of 0.5 and stored in aliquots at –80 °C until used. Therapeutic treated cultures were inoculated with 10<sup>6</sup> bacteria and grown in either the presence or the absence of rifampin (10 µg/mL) plus isoniazid (10 µg/mL) before detection of bacteria with CNIR substrate.

**Macrophage Infection Assays.** J774A.1 cells were seeded at 2.5 × 10<sup>5</sup> cells/well in 24-well dishes or 1 × 10<sup>5</sup> cells/well in 8-well chamber slides and incubated overnight at 37 °C in DMEM. The media was changed just before infection with 0.2 mL of media that contains 10<sup>6</sup> bacteria, a multiplicity of infection (MOI) of ≈10 (bacteria/cell). The bacteria were incubated with the cells for 30 min at 37 °C and washed twice with warm PBS, and the media was replaced with DMEM plus 1% FBS. The cells in triplicate wells were either prepared for microscopy or scraped for FACS analyses. Viability was >98% and was not impacted by the presence of any substrates for the duration of experiments.

**Flow Cytometry.** J774A.1 cells were seeded in six-well plates with 1 × 10<sup>6</sup> cells/well in 2 mL of DMEM with 10% FBS and incubated at 37 °C with 5% CO<sub>2</sub> overnight. After removing the cell culture medium, GFP expressing CDC1551 strains were added to the six-well plates at an MOI of 1, 5, and 20 (bacteria per macrophage) in DMEM with 10% FBS in 200 µL. After 30 min coinubation, the cells were washed twice with prewarmed PBS to remove extracellular bacteria. Amikacin at a final concentration of 200 µg/mL was added to the medium and incubated for 2 h to kill extracellular bacteria. The cells were washed twice with PBS, and the medium was replaced with DMEM plus 10% FBS with 20 nM CNIR substrate. After various times of coinubation with the substrate at 37 °C in 5% CO<sub>2</sub>, cells were washed twice with PBS and stained with 10 µg/mL DAPI in PBS by incubation for 5 min at room temperature. The cells were then scraped from the wells with a rubber policeman, fixed with ice cold 75% ethanol for 30 min, and stored at –20 °C until flow cytometry.

**Synthesis of β-Lactamase Imaging Probes.** 7-Amino-3-chloromethyl cephalosporanic acid benzhydryl ester was a gift from Otsuka Chemical (Osaka, Japan). CyDye monoreactive NHS esters were obtained from Amersham Biosciences. All of the other starting materials were obtained from Sigma-Aldrich. Commercially available reagents were used without purification, unless indicated

otherwise. The solvents were dry according to standard protocols. All of the other chemicals were reagent grade or better. The synthesized compounds were characterized using <sup>1</sup>H NMR (Bruker ARX 300), and matrix-assisted laser desorption/ionization mass spectrometric analysis was performed at the Mass Spectrometry Facility of Stanford University.

Analytical reverse-phase high-performance liquid chromatography (HPLC) was performed on Acclaim C-18 columns (250 × 4.6 mm) at a flow rate of 1.0 mL/min, and semipreparative HPLC was performed on a similar column (250 × 10 mm) at 3 mL/min. Two solvent systems, A (water with 0.1% TFA) and B (Acetonitrile with 0.1% TFA), were used to elute the products and monitored by UV-visible absorbance at 280 and 650 nm, respectively. HPLC elution was performed with linear gradients of 0.1% trifluoroacetic acid (TFA) in water (solution A) and 0.1% TFA in acetonitrile (solution B). The linear gradient started from 80% solution A and 20% solution B, changed to 20% solution A and 80% solution B in 25 min, to 0% solution A and 100% solution B in the following 5 min, and then back to 80% solution A and 20% solution B in the next 5 min.

**Mouse Infections and Imaging.** Five- to 7-wk-old female BALB/c mice were obtained from Jackson Laboratories. There were four animals in each experimental group, and all experiments have been repeated at least three times independently with consistent results. Quantitative data shown in all figures are means and SDs for all groups. Animals were assigned randomly to experimental groups, allowed to acclimatize to the facilities for 1 wk, and fed commercial chow with low chlorophyll content and tap water ad libitum. To determine bacterial loads, portions of lungs and spleens were homogenized in PBS and dilutions were plated on 7H11 selective media to determine numbers of viable bacteria. For s.c. infections, appropriate concentrations of bacteria in 50 µL of saline were inoculated beneath the skin. Bacterial numbers were confirmed at 24 h postinoculation by harvesting the region of the skin and homogenization in PBS followed by dilution and plating on 7H11. Antibiotic treatment was carried out on four mice per group infected by the intratracheal route with 10<sup>6</sup> bacteria using 10 µg/g rifampin and 10 µg/g isoniazid in combination delivered intraperitoneally in saline daily beginning immediately postinfection. All animal studies were approved by the institutional animal use committee and comply with established guidelines for care and use of animals.

Approximately 5 nmol of each imaging substrate was administered i.v. via the tail vein to each mouse, including uninfected controls. Photographic images were directly overlaid with matching fluorescent images for all mice. Structured light images were taken in cases where fluorescence-mediated molecular tomography was used. Wavelength-resolved spectral imaging was carried out to image CNIR substrates in mice. In the case of CNIR4, the excitation wavelength was 605 nm and emission was collected in 20-nm increments from 640 to 740 nm, and in CNIR5, CNIR9, and CNIR10 the excitation wavelength was 640 nm and emission was collected in 20-nm increments from 680 to 780 nm. Each acquisition was taken for 3 s with f-stop 1 and medium binning. Four mice were imaged for each condition, including in the presence and the absence of therapeutic treatment, and the means for each region of interest were determined.
